# Supplementary material for: Development of CDX-527: a bispecific antibody combining PD-1 blockade and CD27 costimulation for cancer immunotherapy
Source: Springer Nature journal article supplement (doi:10.1007/s00262-020-02610-y), 2020-05-25
Supplement: MOESM1 [file 18010624]

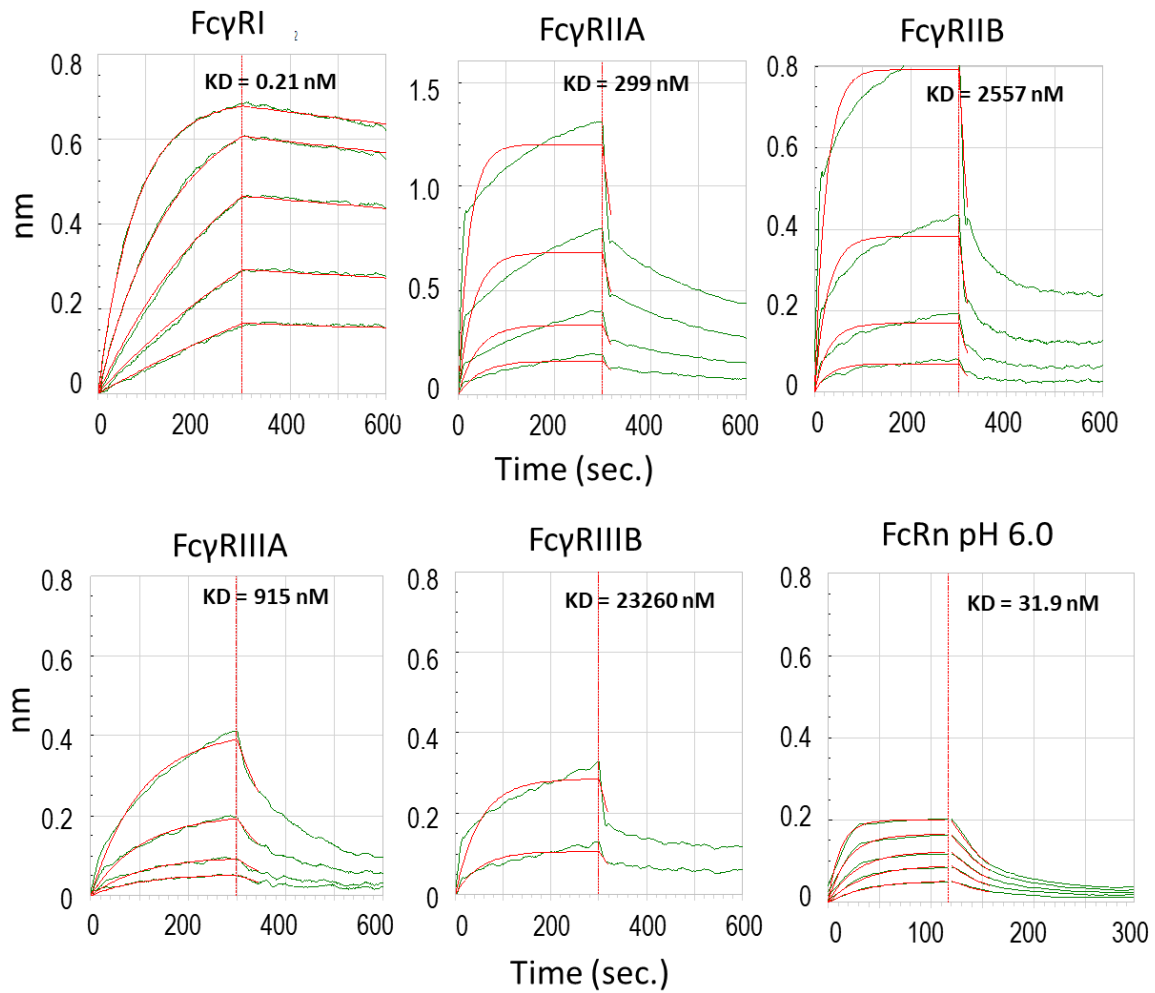

**Supplementary Fig. 1. CDX-527 binding to human Fc receptors.** Sensorgrams of bio-layer interferometry analysis using streptavidin sensors to capture respective biotinylated soluble human Fc receptors followed by serial dilutions of CDX-527. Green lines are association and dissociation curves, red lines represent model fit.

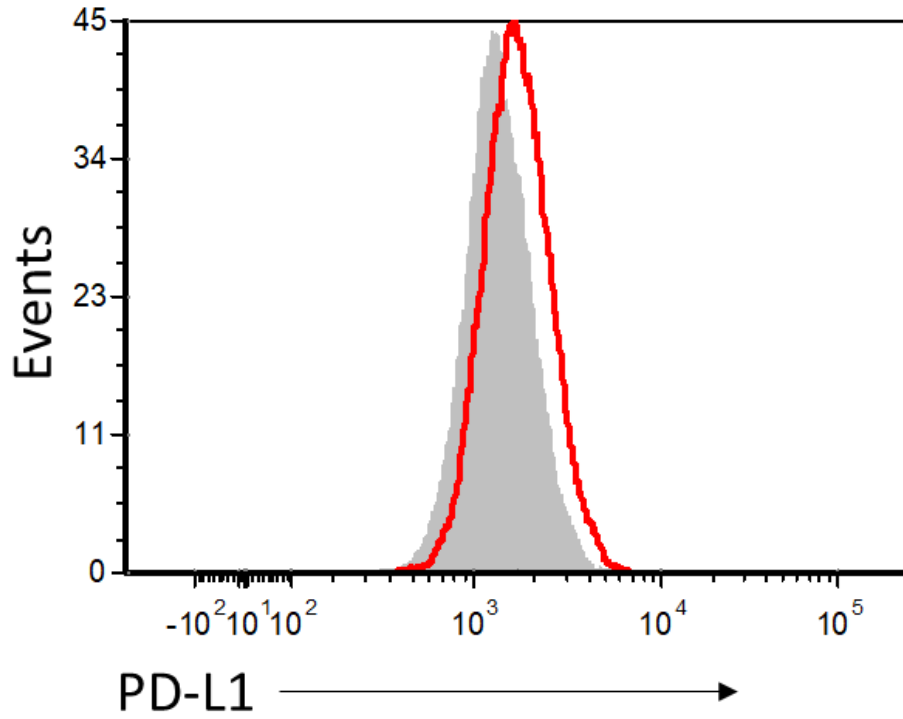

**Supplementary Fig. 2. HEK293 reporter cell expression of PD-L1.** NF $\kappa$ B reporter HEK293 cells expressing CD27 were incubated with a PE-labeled anti-PD-L1 antibody (red line) or isotype control (gray filled) and analyzed on a FACSCanto II<sup>TM</sup> instrument.

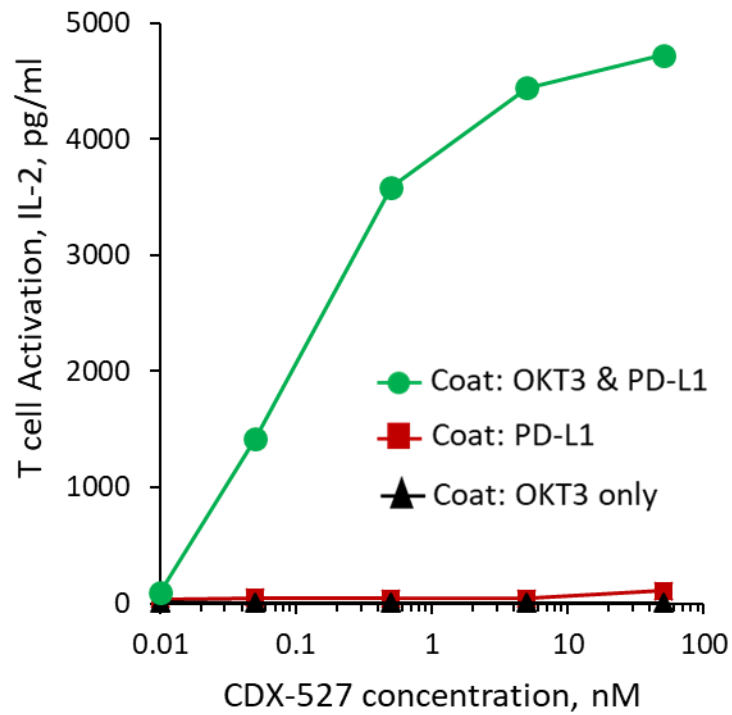

**Supplementary Fig. 3. CDX-527 costimulation of T cells requires simultaneous TCR stimulation and cross-linking.** Primary human T cells and CDX-527 were added to a plate previously coated with suboptimal OKT3, PD-L1, or both as indicated. IL-2 production in the supernatant by T cells was analyzed by ELISA.

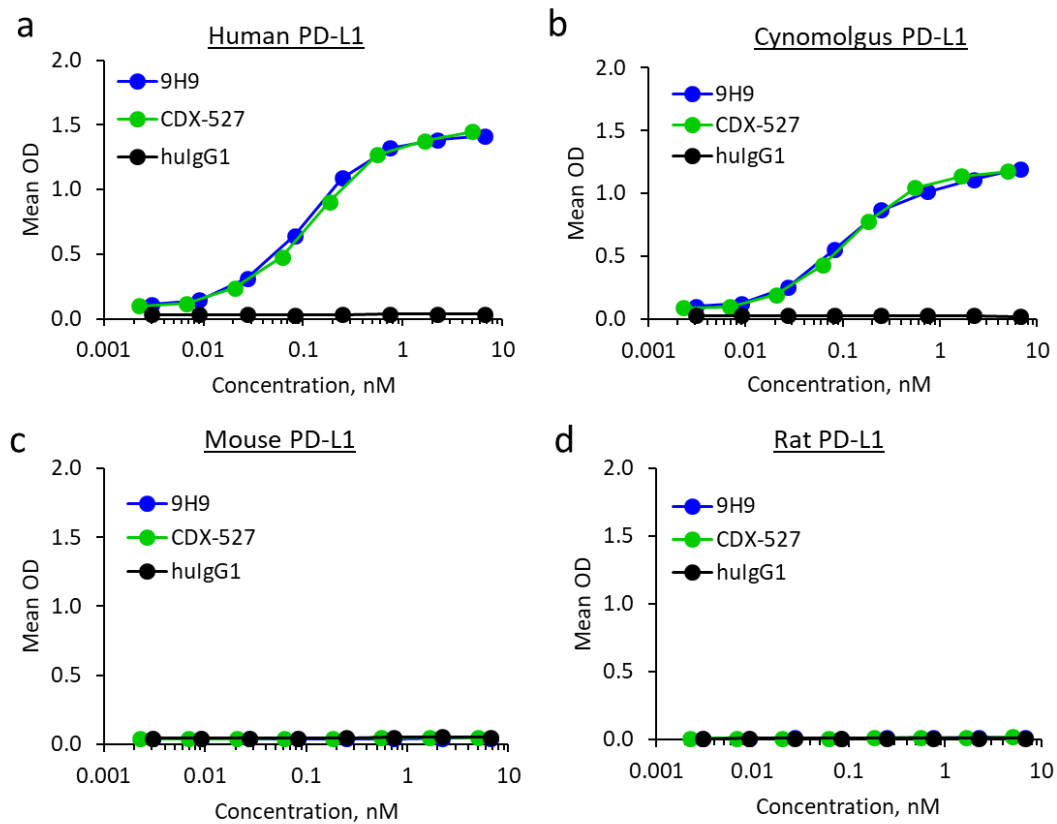

**Supplementary Fig. 4. Species reactivity of CDX-527 and mAb 9H9 with PD-L1.** Species specific PD-L1-huFc (as indicated in **a-d**) were coated at 2  $\mu\text{g}/\text{mL}$ . Samples were added for 1 hour and binding was detected using goat anti-huF(ab')<sub>2</sub> HRP.
